# Supplementary material
Source: Springer Nature journal article supplement (https://www.springermedizin.de/resource/supplementary/12947_2013_469_MOESM4_ESM.pdf/9555810)

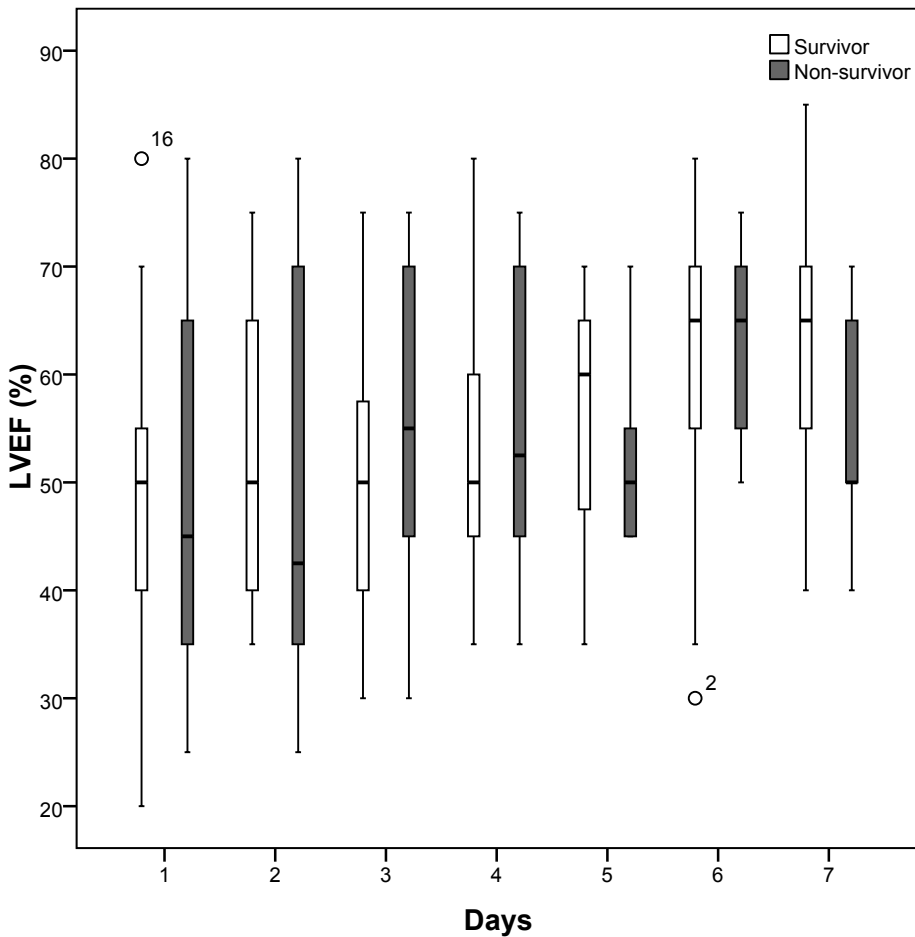

Supplement: MOESM4 [file 9555810]
